# Supplementary material for: Heat stress responses in a large set of winter wheat cultivars (Triticum aestivum L.) depend on the timing and duration of stress
Source: PubMed Central journal article supplement (PMC6754161; doi:10.1371/journal.pone.0222639), 2019-09-20
Supplement: pone.0222639.s001.pdf [file pone.0222639.s001.pdf]

| <b>Cluster 1</b> | <b>Taxa</b> | <b>Pedigree</b> | <b>Country</b> |
|------------------|-------------|-----------------|----------------|
|                  | K9          | DISPONENT       | DE             |
|                  | K194        | CADENZA         | GB             |
|                  | K103        | BONCAP          | FR             |
|                  | K179        | MV-KOLOMPOS     | HU             |
|                  | K161        | LUDWIG          | AT             |
| <b>Cluster 2</b> |             |                 |                |
|                  | K25         | GK-HATTYU       | HU             |
|                  | K140        | RECITAL         | FR             |
|                  | K64         | FLEISCHMANN-481 | HU             |
|                  | K154        | ZLATNA-DOLINA   | HR             |
|                  | K27         | ROANE           | US             |
|                  | K142        | RIGI            | CH             |
|                  | K155        | ADRIANA         | HR             |
|                  | K43         | LUPUS           | AT             |
|                  | K30         | RENAN           | FR             |
|                  | K134        | NORDIC          | US             |
| <b>Cluster 3</b> |             |                 |                |
|                  | K39         | VANEK           | DE             |
|                  | K108        | CUTTER          | US             |
|                  | K159        | DUMBRAVA        | RO             |
|                  | K149        | VALORIS         | FR             |
|                  | K110        | ELLVIS          | DE             |
| <b>Cluster 4</b> |             |                 |                |
|                  | K5          | MV-SUMMA        | HU             |
|                  | K163        | NS-RANA-1       | RS             |
|                  | K35         | AURA            | RO             |
|                  | K6          | MV-PALOTAS      | HU             |
|                  | K57         | FENG-YOU-3      | CN             |
|                  | K97         | BEI-JING-0045   | CN             |
|                  | K190        | YUMAI-34        | CN             |
|                  | K11         | SPADA           | IT             |
|                  | K24         | LANGFANG-3      | CN             |
| <b>Cluster 5</b> |             |                 |                |
|                  | K42         | COURTOT         | FR             |
|                  | K173        | MV-BERES        | HU             |
|                  | K96         | BASTIDE         | FR             |
|                  | K102        | BIGGAR          | CA             |
|                  | K107        | CHARA           | AU             |
|                  | K74         | BUCK-PANADERO   | AR             |
|                  | K170        | SOISSONS        | FR             |
|                  | K120        | KLEIN-FLECHA    | AR             |
|                  | K86         | PERVITSA        | RU             |
|                  | K144        | SAGITTARIO      | IT             |

|                  |      |                      |    |
|------------------|------|----------------------|----|
|                  | K185 | MV-TOBORZO           | HU |
|                  | K101 | BLASCO               | IT |
|                  | K172 | UKRAINKA             | UA |
|                  | K123 | KUKRI                | AU |
|                  | K174 | MV-BODRI             | HU |
|                  | K152 | WILDCAT              | CA |
| <b>Cluster 6</b> |      |                      |    |
|                  | K156 | BABUNA               | MK |
|                  | K7   | MV-MATYO             | HU |
|                  | K26  | MV17-09              | HU |
|                  | K31  | NZ4321-114           | US |
|                  | K59  | SAROZ                | TR |
|                  | K116 | KLEIN-CAPRICORNIO    | AR |
|                  | K41  | SALAMOUNI            | US |
|                  | K122 | KRASOTA              | RU |
|                  | K147 | SPARTACUS            | GB |
|                  | K188 | MV-VERBUNKOS         | HU |
| <b>Cluster 7</b> |      |                      |    |
|                  | K55  | BAYRAKTAR            | TR |
|                  | K61  | TURKMEN              | TR |
|                  | K109 | DIVANA               | HR |
|                  | K126 | MAESTRA              | IT |
|                  | K78  | ORNICAR              | FR |
|                  | K167 | SAN-PASTORE          | IT |
|                  | K77  | NOMADE               | IT |
|                  | K176 | MV-KOKARDA (MV09-09) | HU |
|                  | K85  | GK-HAJNAL            | HU |
|                  | K180 | MV-MARSALL           | HU |
|                  | K200 | GERONIMO             | IT |
|                  | K62  | YILDIZ               | TR |
|                  | K169 | SKOPJANKA            | MK |
|                  | K81  | NW98S097             | US |
|                  | K139 | RAVENNA              | IT |
|                  | K129 | MV-AMANDA            | HU |
|                  | K68  | GK-BEKES             | HU |
|                  | K158 | DEMETRA-OS           | HR |
|                  | K141 | RED-RIVER-68         | US |
|                  | K187 | MV-KARIZMA           | HU |
|                  | K143 | RUZICA               | HR |
|                  | K69  | GK-CSILLAG           | HU |
|                  | K135 | NUO-MAIZI            | CN |
|                  | K157 | BRIANA               | RO |
|                  | K13  | AGENT                | US |
|                  | K17  | GK-HEJA              | HU |
|                  | K94  | BALANCE              | FR |

|                  |      |              |    |
|------------------|------|--------------|----|
|                  | K54  | ARMCIM       | TR |
|                  | K47  | HALLAM       | US |
|                  | K114 | GK-GONCOL    | HU |
|                  | K112 | FERIA        | AT |
|                  | K29  | ORH010918    | TR |
|                  | K46  | GK-FENY      | HU |
|                  | K184 | MV-TALLER    | HU |
|                  | K15  | BURATINO     | CZ |
|                  | K37  | MV-HOMBAR    | HU |
|                  | K79  | MV27-07      | HU |
| <b>Cluster 8</b> |      |              |    |
|                  | K3   | MV-MAGMA     | HU |
|                  | K90  | ARIDA        | SK |
|                  | K84  | GK-BERENY    | HU |
|                  | K93  | BALADA       | CZ |
|                  | K91  | ALTAY-2000   | TR |
|                  | K192 | KWS-SCIROCCO | DE |
|                  | K160 | LIBELLULA    | IT |
|                  | K171 | TOMMI        | DE |
|                  | K197 | SUNSTAR      | AU |
