# Supplementary material for: Heat stress responses in a large set of winter wheat cultivars (Triticum aestivum L.) depend on the timing and duration of stress
Source: PubMed Central journal article supplement (PMC6754161; doi:10.1371/journal.pone.0222639), 2019-09-20
Supplement: pone.0222639.s002.pdf [file pone.0222639.s002.pdf]

|             | <b>PH</b> | <b>SPIK</b> | <b>BIOM</b> | <b>RT</b> | <b>HI</b> | <b>AS</b> | <b>ATKW</b> | <b>GY</b> |
|-------------|-----------|-------------|-------------|-----------|-----------|-----------|-------------|-----------|
| <b>ZD49</b> |           |             |             |           |           |           |             |           |
| C           | 4.42      | 2.36        | 5.46        | 4.19      | 1.47      | 4.07      | 2.49        | 4.02      |
| H5          | 4.31      | 2.51        | 5.44        | 4.74      | 2.27      | 5.62      | 3.04        | 4.83      |
| H10         | 4.30      | 2.57        | 5.99        | 5.33      | 2.56      | 6.77      | 2.68        | 5.85      |
| H15         | 4.33      | 2.51        | 6.63        | 5.25      | 2.78      | 7.24      | 2.77        | 6.53      |
| <b>ZD59</b> |           |             |             |           |           |           |             |           |
| C           | 4.67      | 2.36        | 7.03        | 5.61      | 2.17      | 4.16      | 2.64        | 5.57      |
| H5          | 4.84      | 2.45        | 8.22        | 5.73      | 5.13      | 5.44      | 2.88        | 6.56      |
| H10         | 4.85      | 2.45        | 9.53        | 5.54      | 5.71      | 5.48      | 2.91        | 6.88      |
| H15         | 4.87      | 2.55        | 10.18       | 4.95      | 6.25      | 5.38      | 3.30        | 6.13      |
| <b>ZD72</b> |           |             |             |           |           |           |             |           |
| C           | 4.70      | 2.32        | 5.12        | 4.11      | 1.63      | 4.07      | 2.75        | 4.06      |
| H5          | 4.66      | 2.46        | 5.76        | 3.91      | 2.22      | 5.20      | 2.89        | 5.41      |
| H10         | 4.69      | 2.31        | 6.01        | 4.48      | 2.38      | 5.51      | 2.88        | 5.92      |
| H15         | 4.64      | 2.31        | 6.06        | 4.52      | 2.63      | 5.77      | 3.31        | 6.72      |

**PH** - Plant height, **SPIK** - Spikelet number per main ear, **BIOM** - Straw biomass, **RT** - Reproductive tillers, **HI** - Harvest index, **AS** - Average seed number, **ATKW** - Average thousand-kernel weight, **GY** - Grain yield; **C** - Control, **H5** - **H10** - **H15** - Heat stress lasting 5, 10 and 15 days; **ZD49** - Booting stage, **ZD59** - Heading, **ZD72** - Early milk development
