# Supplementary material for: Heat stress responses in a large set of winter wheat cultivars (Triticum aestivum L.) depend on the timing and duration of stress
Source: PubMed Central journal article supplement (PMC6754161; doi:10.1371/journal.pone.0222639), 2019-09-20
Supplement: pone.0222639.s003.pdf [file pone.0222639.s003.pdf]

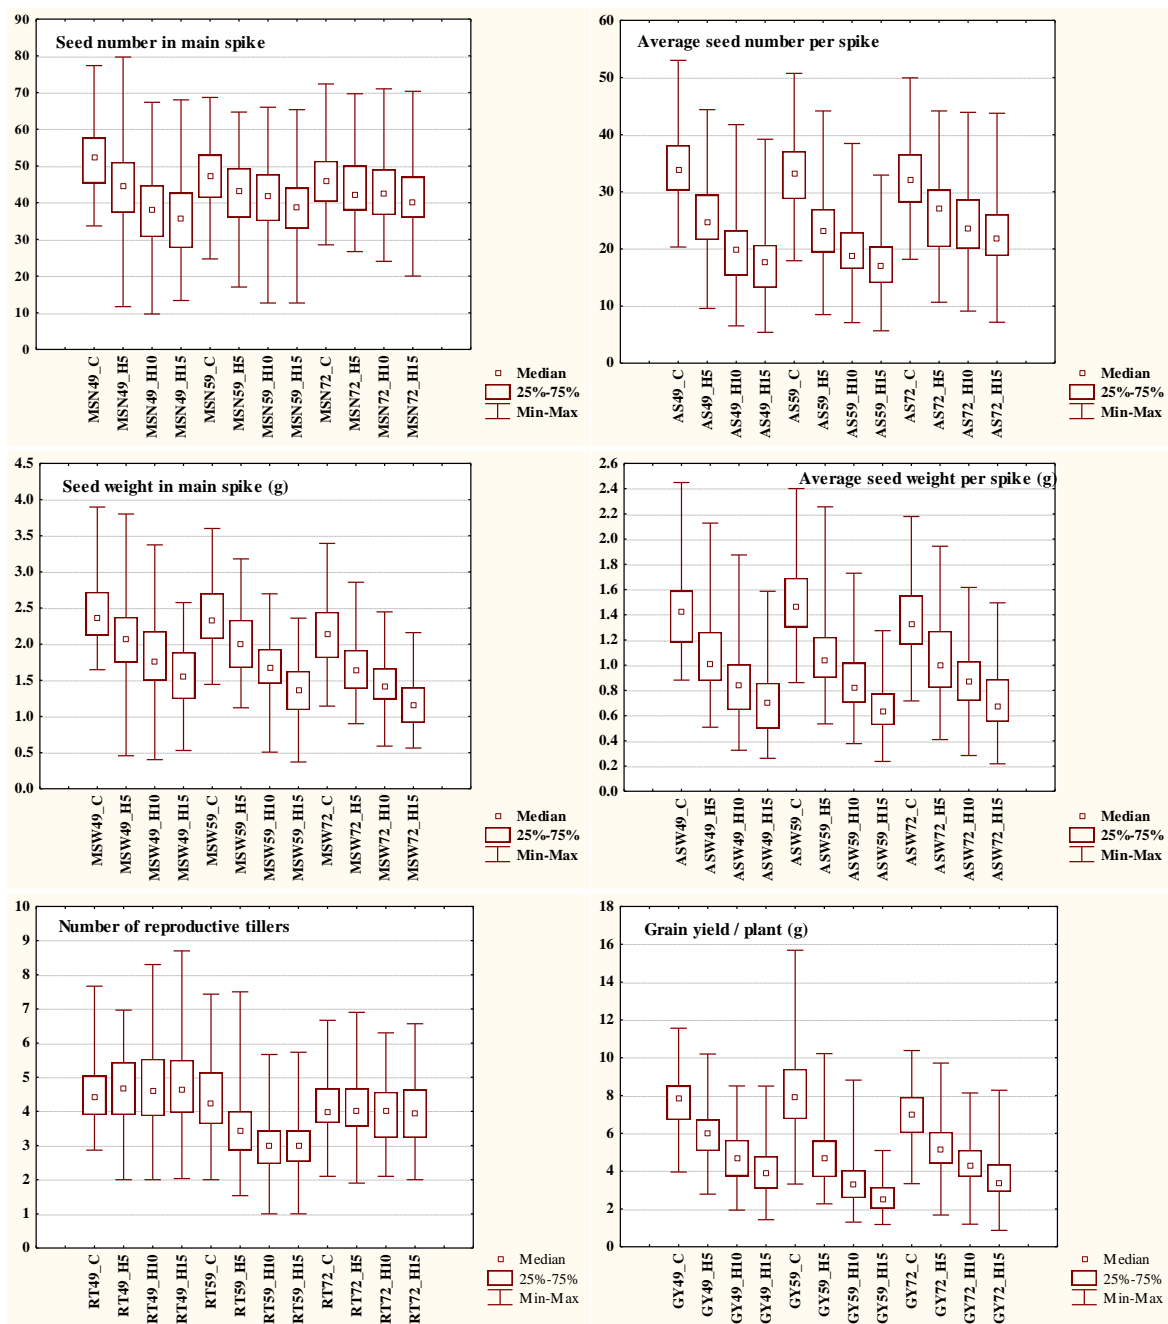

**C** - Control, **H5** - **H10** - **H15** - Heat stress lasting 5, 10 and 15 days; **ZD49** - Booting stage, **ZD59** - Heading, **ZD72** - Early milk development
