# Supplementary material for: Heat stress responses in a large set of winter wheat cultivars (Triticum aestivum L.) depend on the timing and duration of stress
Source: PubMed Central journal article supplement (PMC6754161; doi:10.1371/journal.pone.0222639), 2019-09-20
Supplement: pone.0222639.s004.pdf [file pone.0222639.s004.pdf]

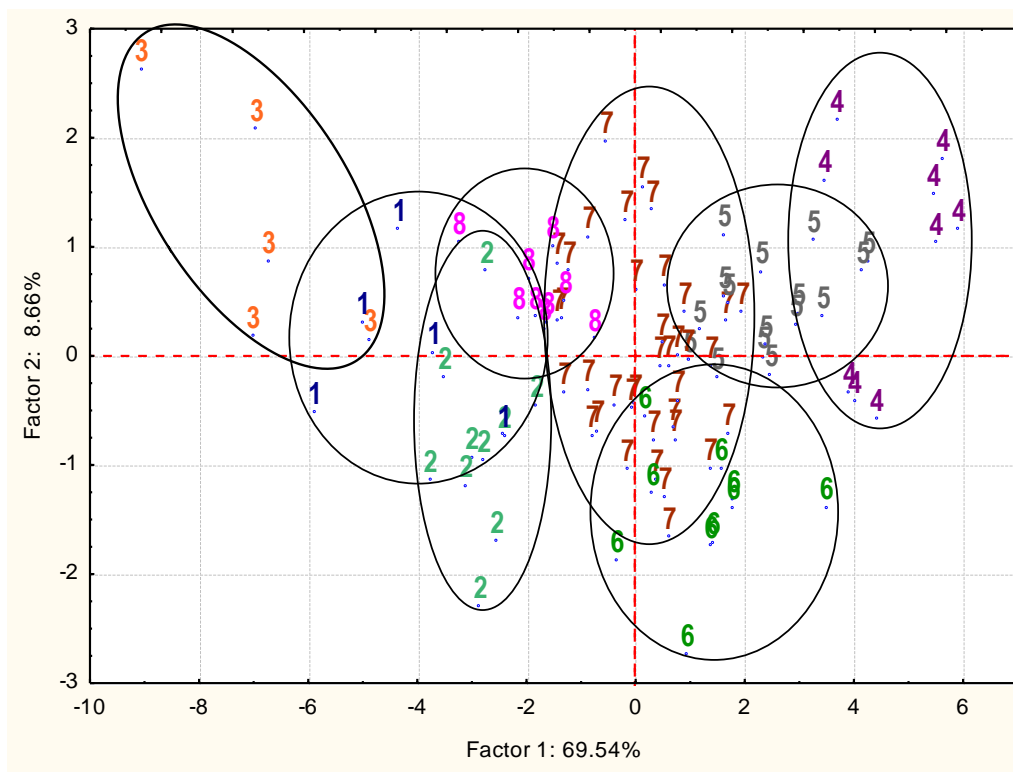

| Factor – variable correlations |               |               |               |
|--------------------------------|---------------|---------------|---------------|
| Variables                      | Factor 1      | Factor 2      | Factor 3      |
| GY49_C                         | <b>-0.826</b> | <b>-0.392</b> | 0.031         |
| GY49_H5                        | <b>-0.844</b> | 0.044         | <b>-0.383</b> |
| GY49_H10                       | <b>-0.839</b> | 0.173         | <b>-0.439</b> |
| GY49_H15                       | <b>-0.847</b> | 0.259         | <b>-0.349</b> |
| GY59_C                         | <b>-0.766</b> | -0.221        | 0.199         |
| GY59_H5                        | <b>-0.868</b> | -0.232        | 0.115         |
| GY59_H10                       | <b>-0.833</b> | <b>0.421</b>  | 0.220         |
| GY59_H15                       | -0.697        | <b>0.511</b>  | <b>0.400</b>  |
| GY72_C                         | <b>-0.842</b> | <b>-0.350</b> | 0.134         |
| GY72_H5                        | <b>-0.886</b> | -0.255        | 0.123         |
| GY72_H10                       | <b>-0.882</b> | -0.182        | 0.076         |
| GY72_H15                       | <b>-0.858</b> | -0.157        | -0.048        |

**GY** - Grain yield; **C** - Control, **H5** - **H10** - **H15** - Heat stress lasting 5, 10 and 15 days; **ZD49** - Booting stage, **ZD59** - Heading, **ZD72** - Early milk development
